# Supplementary material
Source: PubMed Central journal article supplement (PMC9400548)
Supplement: NIHMS1824286-supplement-1.pdf [file NIHMS1824286-supplement-1.pdf]

**Supplement Table 2:** Characteristics of animal models (A) exosomes isolation (B), characterization of cell surface proteins of administered exosomes (C), and sources of exosomes (D).

| <b>A: Overall characteristics of the studies</b>                                                                     |    |           |      |              |              |                     |    |
|----------------------------------------------------------------------------------------------------------------------|----|-----------|------|--------------|--------------|---------------------|----|
| Study Model                                                                                                          |    | EV Source |      | Injury Type  |              | Outcome             |    |
| Mouse                                                                                                                | 32 | MSC       | 22   | Excision     | 40           | Wound closure rate  | 43 |
| Rat                                                                                                                  | 19 | Umbilical | 8    | Burn         | 23           | Angiogenesis        | 24 |
| Human                                                                                                                | 2  | Plasma    | 3    | Flap         | 3            | Collagen deposition | 7  |
| Other                                                                                                                | 3  | Other     | 18   | Other models | 4            | Other               | 13 |
| <b>B: Isolation techniques used in the studies</b>                                                                   |    |           |      |              |              |                     |    |
| Isolation Procedure                                                                                                  |    | Mice      | Rats | Total        | %            |                     |    |
| Ultracentrifugation                                                                                                  |    | 19        | 16   | 35           | 70           |                     |    |
| Manufacturer's kit                                                                                                   |    | 8         | 0    | 8            | 16           |                     |    |
| Ultracentrifugation + Filtration                                                                                     |    | 3         | 2    | 5            | 10           |                     |    |
| Tangential Flow & others                                                                                             |    | 2         | 0    | 2            | 4            |                     |    |
| <b>C: Percentage of studies utilizing different membrane surface proteins to visualize and characterize exosomes</b> |    |           |      |              |              |                     |    |
| CD markers                                                                                                           |    | Mice      | Rats | Total        | % of studies |                     |    |
| CD63                                                                                                                 |    | 22        | 12   | 34           | 47.22        |                     |    |
| CD9                                                                                                                  |    | 16        | 13   | 29           | 40.28        |                     |    |
| CD81                                                                                                                 |    | 15        | 10   | 25           | 34.72        |                     |    |
| TSG101                                                                                                               |    | 11        | 4    | 15           | 20.83        |                     |    |
| HSP70                                                                                                                |    | 3         | 3    | 6            | 8.33         |                     |    |
| GM130                                                                                                                |    | 1         | 2    | 3            | 4.17         |                     |    |
| Grp94                                                                                                                |    | 1         | 1    | 2            | 2.78         |                     |    |
| Flotilin                                                                                                             |    | 1         | 1    | 2            | 2.78         |                     |    |
| Annexin V                                                                                                            |    | 1         | 1    | 2            | 2.78         |                     |    |
| Others (EpCam, GRP90, CD90, CD105, MHC-I, MHC-II, CD86)                                                              |    |           | 1    | 1            | 1.39         |                     |    |

**D: Unique sources of biological materials used to isolate exosomes**

| Sources of exosomes  | Mice | Rats | Total studies |
|----------------------|------|------|---------------|
| MSCs                 | 14   | 8    | 22            |
| Umbilical            | 3    | 5    | 8             |
| Embryonic stem cells | 2    | -    | 2             |
| Human PRP and Plasma | 2    | 1    | 3             |
| Fibroblast           | 2    | 1    | 3             |
| HUVECs               | 2    | 2    | 4             |
| Macrophage           | -    | 1    | 1             |
| Keratinocyte         | 1    | 1    | 2             |
| Macrophage           | -    | 1    | 1             |
| Urine                | 1    | -    | 1             |
| DC cells             | 1    | -    | 1             |
| Others               | 4    | 1    | 5             |

**Supplement Table 3:** Isolation and Characterization of exosomes used in the study mice (a) and rats (b).**a. MICE STUDIES**

|    | <b>Authors</b>                               | <b>Animal Model</b>            | <b>Sources of exosomes</b>                       | <b>Isolation techniques</b>                    | <b>Visualization techniques</b> | <b>Characterizations markers</b> |
|----|----------------------------------------------|--------------------------------|--------------------------------------------------|------------------------------------------------|---------------------------------|----------------------------------|
| 1. | Xiong Y, et al. (Xiong Y. et al., 2020a)     | C57BL/6                        | Plasma                                           | Others                                         | Microscopy, WB                  | CD81 and TSG101                  |
| 2. | Liu K, et al. (Liu et al., 2019)             | Nude                           | human liposuction                                | Ultracentrifugation                            | Microscopy                      | Not Stated                       |
| 3. | Kobayashi H, et al. (Kobayashi et al., 2018) | C57BL/6S/J-Leprdb (db/db) mice | iPS cell culture media                           | MagCapture Exosome Isolation commercial Kit PS | Microscopy and Flow cytometry   | CD9, CD63, and CD81              |
| 4. | He X, et al. (He et al., 2019)               | C57BL/6                        | MSCs                                             | Centrifugation and ExoQuick-TC commercial kit  | Microscopy, WB                  | CD63 and CD81                    |
| 5. | Su D, et al. (Su et al., 2020)               | C57BL/6                        | Hu and mouse melanoma cell lines                 | Ultracentrifugation                            | Western, microscopy             | CD63, CD81, Alix                 |
| 6. | Zhang J, et al. (Xu et al., 2020)            | C57BL/6                        | Endothelial progenitor cells                     | Centrifugation (10000g) with a gradient        | Imaging, TEM, WB                | CD9 and CD63                     |
| 7. | Zhao G, et al. (Zhao G. et al., 2020)        | C57BL/6                        | MSCs                                             | Ultracentrifugation                            | WB, Microscopy                  | CD9 and CD63, TSG101, HSP70      |
| 8. | Wang L, et al. (Wang L. et al., 2019)        | Mice (BALB/c)                  | huMSC                                            | Ultracentrifugation                            | NanoSight, WB                   | CD9, CD63, and CD81              |
| 9. | Kim H, et al. (Kim et al., 2019)             | Balb/c Mice                    | Mice BMSCs induced to either M1 or M2 Macrophage | Ultracentrifugation                            | TEM                             | CD63 and Alix                    |

|     |                                           |                         |                                                                          |                                               |                                |                                 |
|-----|-------------------------------------------|-------------------------|--------------------------------------------------------------------------|-----------------------------------------------|--------------------------------|---------------------------------|
| 10. | Chen J, et al. (Chen Jialin et al., 2019) | Others                  | Others                                                                   | Commercial Kit                                |                                | TSG101, CD63, glycosylated CD63 |
| 11. | Zhao B, et al. (Zhao et al., 2018)        | C57BL/6                 | hu Amnion                                                                | Ultracentrifugation                           | Flow cytometry, WB, Microscopy | CD9, CD63, and CD81             |
| 12. | Chen CY, et al. (Chen et al., 2018)       | C57BL/6                 | urine-derived stem cells (USCs)                                          | Centrifugation, filtration and Commercial Kit | Flow cytometry, WB, Microscopy | CD63 and TSG101                 |
| 13. | Wang C, et al. (Shi Yu et al., 2019)      | ICR                     | AMSCs-derived exosomes                                                   | ultracentrifugation                           | Flow cytometry, WB, Microscopy | Alix, CD63, CD9, CD81           |
| 14. | Wang M, et al. (Wang M. et al., 2019)     | ICR                     |                                                                          | Ultracentrifugation                           | Flow cytometry, WB, Microscopy | CD9, CD29, CD44, CD81, SCA-1    |
| 15. | Trinh NT, et al. (Trinh et al., 2016)     | Female C57BL/6          | hu- ASC                                                                  | Ultracentrifugation                           | Flow cytometry                 | CD105, CD90, and APC-anti-CD45  |
| 16. | Wang X, et al. (Wang Xiao et al., 2019)   | C57BL/6                 | mouse full-thickness skin wound model                                    | ExoQuick-TC commercial kit                    | WB, Microscopy                 | CD63, Alix, and Tsg101          |
| 17. | Xiong Y, et al. (Xiong Y. et al., 2020b)  | C57BL/6                 | Peripheral blood of non-diabetic and diabetic patients with a foot wound | Ultracentrifugation                           | WB, Microscopy                 | CD9 and TSG101                  |
| 18. | Zhang Y, et al. (Zhang et al., 2020)      | C57BL/6                 | Female ASCs                                                              | Ultracentrifugation                           | WB, Microscopy, TEM            | CD9, CD63                       |
| 19. | Chen B, et al. (Chen Bi et al., 2019)     | C57BL/6 and HUVEC cells | hESCs; H9                                                                | Ultracentrifugation                           | NanoSight, TEM, WB             | CD9, CD63, TSG-101              |

|     |                                                      |                                                                                                                                |                                                                                                             |                                                                               |                                                                                             |                                                            |
|-----|------------------------------------------------------|--------------------------------------------------------------------------------------------------------------------------------|-------------------------------------------------------------------------------------------------------------|-------------------------------------------------------------------------------|---------------------------------------------------------------------------------------------|------------------------------------------------------------|
| 20. | Hu Y, et al. (Hu et al., 2018)                       | HUVEC cells, fibroblasts, and 12 wks. male C57BL6 mice (26-30 g)                                                               | Human umbilical cord blood plasma (UCB-Exos)                                                                | Ultracentrifugation                                                           | Dynamic light scattering, TEM, Flow cytometry                                               | CD63, TSG101                                               |
| 21. | Wang L, et al. (Wang et al., 2017)                   | Balb/c mice (6–8 wk. old). Full-thickness dorsal wounds (2.0 × 1.5 cm <sup>2</sup> )                                           | SC adipose tissue from healthy mothers (18–30 years old) undergoing cesarean section                        | Ultra-15 Centrifugal Filter Device (Millipore) and ExoQuick-TC commercial Kit | NanoSight                                                                                   | CD63, CD9                                                  |
| 22. | Yang C, et al. (Yang et al., 2020)                   | HaCaT cells. spontaneously transformed aneuploid immortal keratinocyte cell line from adult human skin), in vivo: BALb/c mouse | adipose tissue from a 2-year female patient from the abandoned tissue of full-layer skin transplant surgery | Ultracentrifugation                                                           | TEM, Flow cytometry, WB                                                                     | CD63 and CD81                                              |
| 23. | Bakhtyar N, et al. (Bakhtyar et al., 2018)           | mice excision model                                                                                                            | Wharton's jelly of the human umbilical cord                                                                 | Ultracentrifugation                                                           | TEM, SEM. Mass spectrophotometry to characterize exosome cargo.                             | CD81                                                       |
| 24. | Hu L, et al. (Hu et al., 2016)                       | Adult male Balb/c mice                                                                                                         | ASCs                                                                                                        | ExoQuick-TC exosome commercial kit                                            | Dynamic tracking video capture, WB, NanoSight                                               | CD9 and CD63                                               |
| 25. | Dalirfardouei R, et al. (Dalirfardouei et al., 2019) | C57BL/6 (induced diabetic)                                                                                                     | human volunteers- Menstrual Blood MSC                                                                       | Ultracentrifugation                                                           | Field- emission scanning electron microscopy (MIRA3 TESCAN) and atomic force microscopy, WB | CD81, TSG101                                               |
| 26. | Geiger A, et al. (Geiger et al., 2015)               | B6.Lept db/db (genetically diabetic)                                                                                           | Healthy human volunteers circulating fibrocytes                                                             | Ultracentrifugation                                                           | NanoSight, Flow cytometry, WB                                                               | CD9, CD63, CD81, MHC-I, MHC-II, CD80, CD86, TSG101, GM130, |

|     |                                             |                            |                                                                          |                                         |                            |                                                                                                         |
|-----|---------------------------------------------|----------------------------|--------------------------------------------------------------------------|-----------------------------------------|----------------------------|---------------------------------------------------------------------------------------------------------|
| 27. | Hu S, et al. (Hu et al., 2019)              | Mouse Foxn1nu (nude mouse) | 1. hBM-MSC<br>2. Human dermal fibroblasts<br>3. Human dermal fibroblasts | Ultracentrifugation / Ultrafiltration   | NanoSight                  | CD81) and multivesicular body synthesis proteins (Alix)                                                 |
| 28. | Yang K, et al. (Yang et al., 2019)          | Mice (BALB/c)              | hucMSC                                                                   | QIAGEN exoEasy Maxi commercial kit      | TEM, WB                    | HSP70, CD9                                                                                              |
| 29. | Yin H, et al. (Yin et al., 2019)            | Female C57BL/6             | Cyanobacteria <i>Synechococcus elongatus</i> PCC7942                     | Ultracentrifugation and ultrafiltration | TEM, Nanosizer™ instrument | NA                                                                                                      |
| 30. | Li B, et al. (Li et al., 2020)              | C57BL/6                    | mice BMSC                                                                | Ultracentrifugation                     | Flow cytometry, TEM, WB    | CD63, CD81, TSG101, heat shock protein 70 (HSP70), and the negative marker GRP94 expression in exosomes |
| 31. | Qiu X, et al. (Qiu et al., 2020)            | C57BL/6                    | mice BMSC                                                                | Ultracentrifugation                     | WB, TEM                    | CD9, CD63, CD81 and TSG101                                                                              |
| 32. | <u>Zhang Y, et al. (Zhang et al., 2019)</u> | C57BL/6                    | ESC                                                                      | Ultracentrifugation                     | WB, Microscopy             | CD9, CD63                                                                                               |

#### b. RATS STUDIES

|    | Authors                             | Animal Model   | Sources of exosomes       | Isolation techniques | Visualization techniques                                | Characterization markers |
|----|-------------------------------------|----------------|---------------------------|----------------------|---------------------------------------------------------|--------------------------|
| 1. | Li M, et al. (Li et al., 2019)      | Sprague Dawley | RAW 264.7 cells           | Ultracentrifugation  | Flow cytometry, TEM, WB                                 | CD63 and Alix            |
| 2. | Zeng T, et al. (Zeng et al., 2019)  | Sprague Dawley | HUVECs                    | Ultracentrifugation  | NanoSight, laser light scattering spectrometer, TEM, WB | CD63, CD9, TSG101, Grp94 |
| 3. | Li X, et al. (Li Xiao et al., 2016) | Sprague Dawley | Human Umbilical Cord MSCs | Ultracentrifugation  | NanoSight, laser light scattering spectrometer,         | CD9 and CD63             |

|     |                                                 |                         |                                                                       |                               | TEM, WB                                                                   |                               |
|-----|-------------------------------------------------|-------------------------|-----------------------------------------------------------------------|-------------------------------|---------------------------------------------------------------------------|-------------------------------|
| 4.  | Zhang J, et al. (Zhang J. et al., 2015)         | Sprague Dawley          | hiPSC-MSC                                                             | Ultracentrifugation           | TEM, WB                                                                   | CD9, CD63 and CD81            |
| 5.  | Gao S, et al. (Gao et al., 2020)                | Sprague Dawley          | human amniotic MSCs (hAMSC)                                           | Centrifugation and Filtration | TEM, WB, Particle Size                                                    | CD9, CD63 and CD81            |
| 6.  | Zhang B, et al. (Zhang B. et al., 2015a)        | Sprague Dawley          | human Umbilical Cord MSCs (hucMSC)                                    | Centrifugation and Filtration | TEM, Particle Size                                                        | CD9, CD63, and CD81           |
| 7.  | Xiong J, et al. (Xiong J. et al., 2020)         | Sprague Dawley          | human ADSCs & human Foreskin Fibroblasts (HFF)                        | Ultracentrifugation           | WB, TEM, Particle size                                                    | CD63, CD81, TSG101, and HSP70 |
| 8.  | Guo SC, et al. (Guo et al., 2017)               | Sprague Dawley          | human PRP                                                             | Ultracentrifugation           | WB, TEM, Particle size                                                    | CD9, CD63, CD81               |
| 9.  | Zhang J, et al. (Zhang et al., 2016)            | Sprague Dawley          | human Umbilical cord MSC                                              | Ultracentrifugation           | TEM and Particle size                                                     | CD9, CD63, CD81               |
| 10. | Zhang B, et al. (Zhang B. et al., 2015b)        | Male Albino Wistar rats | hucMSCs and HFL1 cell lines                                           | Ultracentrifugation           | Particle size, Microscopy, and WB                                         | CD9, CD63, CD81 HSP70         |
| 11. | Zhao D, et al. (Zhao D. et al., 2020)           | Sprague Dawley          | HUVECs                                                                | Ultracentrifugation           | Particle size, Microscopy, and WB                                         | CD9, CD63, CD81, and HSP 70   |
| 12. | Ding J, et al. (Ding et al., 2019)              | Sprague Dawley          | BMSCs reconditioned by deferoxamine (DFO-Exos) to induce angiogenesis | Ultracentrifugation           | TEM, NanoSight, WB                                                        | CD9, CD 63, TSG101, GM130     |
| 13. | Ismail DI, et al. (Ismail and Aboulkhair, 2018) | Sprague-Dawley          | Rats' sub Q adipose tissue                                            | Ultracentrifugation           | intravenous injection<br><br>of 200 $\mu$ PKH26-labeled exosomes, imaging | not stated                    |
| 14. | Jiang T, et al. (Jiang et al., 2020)            | Sprague Dawley          | hBM-MSC-Ex                                                            | Ultracentrifugation           | Reported in the previous study via WB, TEM, NanoSight                     | not stated                    |

|     |                                            |                  |                                                       |                                              |                                              |                                                                    |
|-----|--------------------------------------------|------------------|-------------------------------------------------------|----------------------------------------------|----------------------------------------------|--------------------------------------------------------------------|
| 15. | Li M, et al. (Li M. et al., 2016)          | Male albino rats | human synovial MSCs (SMSC); overexpressing miR-126-3p | Ultracentrifugation                          | Particle Size, TEM                           | could not find the paper                                           |
| 16. | Liu J, et al. (Liu et al., 2020)           | Sprague Dawley   | hu Umbilical Cord MSCs (hucMSC)                       | Ultracentrifugation                          | Particle Size, TEM, NTA                      | CD9, CD63, and CD81                                                |
| 17. | Lv Q, et al. (Lv et al., 2020)             | Sprague Dawley   | hu ASCs                                               | Ultracentrifugation                          | Particle Size, TEM                           | CD9, CD 63, TSG101, CD81. GM130                                    |
| 18. | Sjöqvist S, et al. (Sjöqvist et al., 2019) | Sprague Dawley   | human oral mucosal epithelial cells                   | Ultracentrifugation                          | Particle Size, TEM, WB                       | CD9, Flotilin+, Annexin V-, EpCAM, HSP70-, GRP90- (cell signaling) |
| 19. | Shi R, et al. (Shi et al., 2020)           | Sprague Dawley   | ASCs derived exosomes                                 | Not reported or the wrong reference provided | Not reported or the wrong reference provided | Not reported or the wrong reference provided                       |



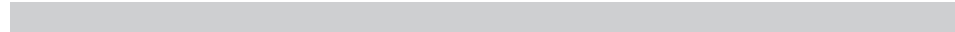

**Supplement Table 1:** Quality check of pre-clinical studies using modified STAIR guidelines.

| MICE STUDIES |                                              |                         |                     |                                        |                         |                        |                                                                  |                                            |                                                 |                                                         |                      |     |
|--------------|----------------------------------------------|-------------------------|---------------------|----------------------------------------|-------------------------|------------------------|------------------------------------------------------------------|--------------------------------------------|-------------------------------------------------|---------------------------------------------------------|----------------------|-----|
| Study #      | Authors Name                                 | Sample Size Calculation | Temperature Control | Publication in a Peer-Reviewed Journal | Treatment Randomization | Allocation Concealment | Avoidance of Anesthetics with Intrinsic Wound Healing Properties | Use of Animals with Relevant Comorbidities | Reporting of Animals Excluded from the Analysis | Statement of Compliance with Animal Welfare Regulations | Conflict of Interest | Sum |
| 1            | Xiong Y, et al. (Xiong Y. et al., 2020a)     | 0                       | 0                   | 1                                      | 1                       | 0                      | 1                                                                | 1                                          | 0                                               | 1                                                       | 1                    | 6   |
| 2            | Liu K, et al. (Liu et al., 2019)             | 0                       | 0                   | 1                                      | 1                       | 0                      | 1                                                                | 0                                          | 0                                               | 0                                                       | 1                    | 4   |
| 3            | Kobayashi H, et al. (Kobayashi et al., 2018) | 0                       | 1                   | 1                                      | 1                       | 1                      | 0                                                                | 1                                          | 0                                               | 1                                                       | 1                    | 7   |
| 4            | He X, et al. (He et al., 2019)               | 0                       | 0                   | 1                                      | 1                       | 0                      | 1                                                                | 0                                          | 0                                               | 1                                                       | 1                    | 5   |
| 5            | Su D, et al. (Su et al., 2020)               | 0                       | 0                   | 1                                      | 1                       | 0                      | 1                                                                | 0                                          | 0                                               | 1                                                       | 1                    | 5   |
| 6            | Xu J, et al. (Xu et al., 2020)               | 0                       | 0                   | 1                                      | 0                       | 0                      | 1                                                                | 0                                          | 0                                               | 1                                                       | 1                    | 4   |
| 7            | Zhao G, et al. (Zhao G. et al., 2020)        | 0                       | 1                   | 1                                      | 1                       | 0                      | 1                                                                | 0                                          | 0                                               | 1                                                       | 1                    | 6   |
| 8            | Wang L, et al. (Wang L. et al., 2019)        | 0                       | 0                   | 1                                      | 0                       | 0                      | 1                                                                | 0                                          | 0                                               | 1                                                       | 1                    | 4   |
| 9            | Kim H, et al. (Kim et al., 2019)             | 0                       | 0                   | 1                                      | 1                       | 0                      | 1                                                                | 0                                          | 0                                               | 1                                                       | 1                    | 5   |
| 10           | Chen J, et al. (Chen Jialin et al., 2019)    | 0                       | 0                   | 1                                      | 0                       | 0                      | 1                                                                | 0                                          | 0                                               | 1                                                       | 1                    | 4   |
| 11           | Zhao B, et al. (Zhao et al., 2018)           | 0                       | 1                   | 1                                      | 1                       | 0                      | 1                                                                | 0                                          | 0                                               | 1                                                       | 1                    | 6   |
| 12           | Chen CY, et al. (Chen et al., 2018)          | 0                       | 0                   | 1                                      | 1                       | 0                      | 1                                                                | 1                                          | 0                                               | 1                                                       | 1                    | 6   |

|    |                                                         |   |   |   |   |   |   |   |   |   |   |   |
|----|---------------------------------------------------------|---|---|---|---|---|---|---|---|---|---|---|
| 13 | Shi, Y, et al.<br>(Shi Yu et al., 2019)                 | 0 | 0 | 1 | 0 | 0 | 1 | 1 | 0 | 1 | 1 | 5 |
| 14 | Wang M, et al.<br>(Wang M. et al., 2019)                | 0 | 0 | 1 | 1 | 0 | 1 | 1 | 0 | 1 | 1 | 6 |
| 15 | Trinh NT, et al.<br>(Trinh et al., 2016)                | 0 | 0 | 1 | 0 | 0 | 1 | 0 | 0 | 1 | 1 | 4 |
| 16 | Wang X, et al.<br>(Wang Xiao et al., 2019)              | 0 | 0 | 1 | 0 | 0 | 1 | 0 | 0 | 1 | 1 | 4 |
| 17 | Xiong Y, et al.<br>(Xiong Y. et al., 2020b)             | 0 | 0 | 1 | 1 | 0 | 1 | 0 | 0 | 1 | 1 | 5 |
| 18 | Zhang Y, et al.<br>(Zhang et al., 2020)                 | 0 | 0 | 1 | 1 | 0 | 1 | 0 | 0 | 1 | 1 | 5 |
| 19 | Chen, B, et al.<br>(Chen Bi et al., 2019)               | 0 | 0 | 1 | 0 | 0 | 1 | 0 | 0 | 1 | 1 | 4 |
| 20 | Hu Y, et al.<br>(Hu et al., 2018)                       | 0 | 0 | 1 | 1 | 0 | 1 | 0 | 0 | 1 | 1 | 5 |
| 21 | Wang L, et al.<br>(Wang et al., 2017)                   | 0 | 0 | 1 | 1 | 0 | 1 | 0 | 0 | 1 | 1 | 5 |
| 22 | Yang C, et al.<br>(Yang et al., 2020)                   | 0 | 0 | 1 | 0 | 0 | 1 | 0 | 0 | 1 | 1 | 4 |
| 23 | Bakhtyar N, et al.<br>(Bakhtyar et al., 2018)           | 0 | 0 | 1 | 1 | 0 | 1 | 0 | 0 | 1 | 1 | 5 |
| 24 | Hu L, et al.<br>(Hu et al., 2016)                       | 0 | 0 | 1 | 1 | 0 | 1 | 0 | 0 | 1 | 1 | 5 |
| 25 | Dalirfardouei R, et al.<br>(Dalirfardouei et al., 2019) | 0 | 1 | 1 | 1 | 0 | 1 | 0 | 0 | 1 | 1 | 6 |
| 26 | Geiger A, et al.<br>(Geiger et al., 2015)               | 0 | 1 | 1 | 1 | 0 | 1 | 0 | 0 | 1 | 0 | 5 |

|                    |                                          |   |   |   |   |   |   |   |   |   |   |   |
|--------------------|------------------------------------------|---|---|---|---|---|---|---|---|---|---|---|
| 27                 | Hu S, et al. (Hu et al., 2019)           | 0 | 0 | 1 | 1 | 0 | 1 | 0 | 0 | 1 | 1 | 5 |
| 28                 | Yang K, et al. (Yang et al., 2019)       | 0 | 1 | 1 | 1 | 0 | 1 | 0 | 0 | 1 | 1 | 6 |
| 29                 | Yin H, et al. (Yin et al., 2019)         | 0 | 0 | 1 | 1 | 0 | 1 | 0 | 0 | 1 | 1 | 5 |
| 30                 | Li B, et al. (Li et al., 2020)           | 0 | 0 | 1 | 1 | 0 | 1 | 1 | 0 | 1 | 1 | 6 |
| 31                 | Qiu X, et al. (Qiu et al., 2020)         | 0 | 1 | 1 | 0 | 0 | 1 | 0 | 0 | 1 | 1 | 5 |
| 32                 | Zhang Y, et al. (Zhang et al., 2019)     | 0 | 0 | 1 | 1 | 0 | 1 | 0 | 0 | 1 | 1 | 5 |
| <b>RAT STUDIES</b> |                                          |   |   |   |   |   |   |   |   |   |   |   |
| 1                  | Li M, et al. (Li et al., 2019)           | 0 | 0 | 1 | 0 | 0 | 1 | 0 | 0 | 1 | 1 | 4 |
| 2                  | Zeng T, et al. (Zeng et al., 2019)       | 0 | 0 | 1 | 1 | 0 | 1 | 0 | 0 | 1 | 1 | 5 |
| 3                  | Li X, et al. (Li Xiao et al., 2016)      | 0 | 0 | 1 | 1 | 0 | 1 | 0 | 0 | 1 | 1 | 5 |
| 4                  | Zhang J, et al. (Zhang J. et al., 2015)  | 0 | 0 | 1 | 1 | 0 | 1 | 0 | 0 | 1 | 1 | 5 |
| 5                  | Gao S, et al. (Gao et al., 2020)         | 0 | 0 | 1 | 1 | 0 | 1 | 0 | 0 | 1 | 1 | 5 |
| 6                  | Zhang B, et al. (Zhang B. et al., 2015a) | 0 | 1 | 1 | 1 | 0 | 1 | 0 | 0 | 1 | 1 | 6 |
| 7                  | Xiong J, et al. (Xiong J. et al., 2020)  | 0 | 0 | 1 | 1 | 0 | 1 | 0 | 0 | 1 | 1 | 5 |
| 8                  | Guo SC, et al. (Guo et al., 2017)        | 0 | 0 | 1 | 1 | 0 | 1 | 0 | 0 | 1 | 1 | 5 |
| 9                  | Zhang J, et al. (Zhang et al., 2016)     | 0 | 0 | 1 | 1 | 0 | 1 | 0 | 0 | 1 | 1 | 5 |

|                |                                                 |   |    |    |    |   |    |   |   |    |     |          |
|----------------|-------------------------------------------------|---|----|----|----|---|----|---|---|----|-----|----------|
| 10             | Zhang B, et al. (Zhang B. et al., 2015b)        | 0 | 1  | 1  | 1  | 0 | 1  | 0 | 0 | 1  | 1   | 6        |
| 11             | Zhao D, et al. (Zhao D. et al., 2020)           | 0 | 0  | 1  | 1  | 0 | 1  | 0 | 0 | 1  | 1   | 5        |
| 12             | Ding, J, et al. (Ding et al., 2019)             | 0 | 0  | 1  | 1  | 0 | 1  | 1 | 0 | 1  | 1   | 6        |
| 13             | Ismail DI, et al. (Ismail and Aboulkhair, 2018) | 0 | 1  | 1  | 1  | 0 | 1  | 0 | 0 | 1  | 1   | 6        |
| 14             | Jiang, T, et al. (Jiang et al., 2020)           | 0 | 0  | 1  | 1  | 0 | 1  | 0 | 0 | 1  | 1   | 5        |
| 15             | Li M, et al. (Li M. et al., 2016)               | 0 | 0  | 1  | 1  | 0 | 1  | 0 | 0 | 1  | 0   | 4        |
| 16             | Liu J, et al. (Liu et al., 2020)                | 0 | 1  | 1  | 1  | 0 | 1  | 0 | 0 | 1  | 1   | 6        |
| 17             | Lv Q, et al. (Lv et al., 2020)                  | 0 | 0  | 1  | 1  | 0 | 1  | 0 | 0 | 1  | 1   | 5        |
| 18             | Sjöqvist S, et al. (Sjöqvist et al., 2019)      | 0 | 0  | 1  | 1  | 0 | 1  | 0 | 0 | 1  | 0   | 4        |
| 19             | Shi R, et al. (Shi et al., 2020)                | 0 | 0  | 1  | 1  | 0 | 1  | 0 | 0 | 1  | 1   | 5        |
| <b>Average</b> |                                                 | 0 | 11 | 51 | 41 | 1 | 50 | 7 | 0 | 50 | 48  | 5.08     |
|                |                                                 |   |    |    |    |   |    |   |   |    | Std | 0.751597 |
